# Supplementary material
Source: publisher figshare collection journal article supplement (https://acs.figshare.com/ndownloader/files/4101037)
Supplement: Supplementary file 1 [file 4101037]

# Supporting Information

## Highly Stable Porous Silicon-Carbon Composites as Label-Free Optical Biosensors

*Chun Kwan Tsang<sup>†</sup>, Timothy L. Kelly<sup>‡</sup>, Michael J. Sailor<sup>‡\*</sup>, and Yang Yang Li<sup>†\*</sup>*

<sup>‡</sup> Department of Chemistry and Biochemistry, University of California, San Diego, 9500 Gilman  
Drive, La Jolla, CA, 92093-0358, USA

<sup>†</sup> Department of Physics and Materials Science, City University of Hong Kong, 83 Tat Chee  
Avenue, Kowloon Tong, Hong Kong, P.R. China

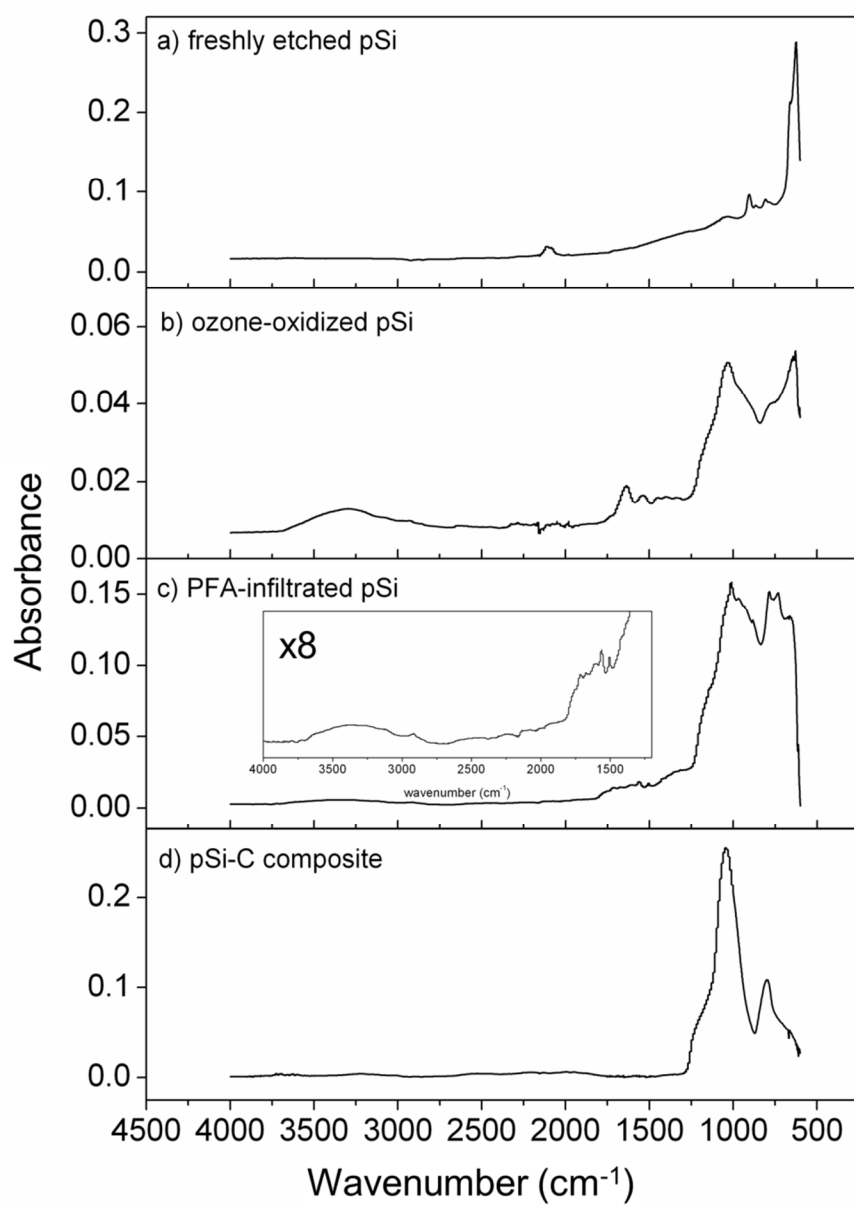

**Supporting Figure S1.** Attenuated total reflectance Fourier transform infrared (FTIR-ATR) spectra (a) freshly etched pSi; (b) ozone oxidized pSi; (c) PFA-infiltrated pSi; (d) pSi-C composite.

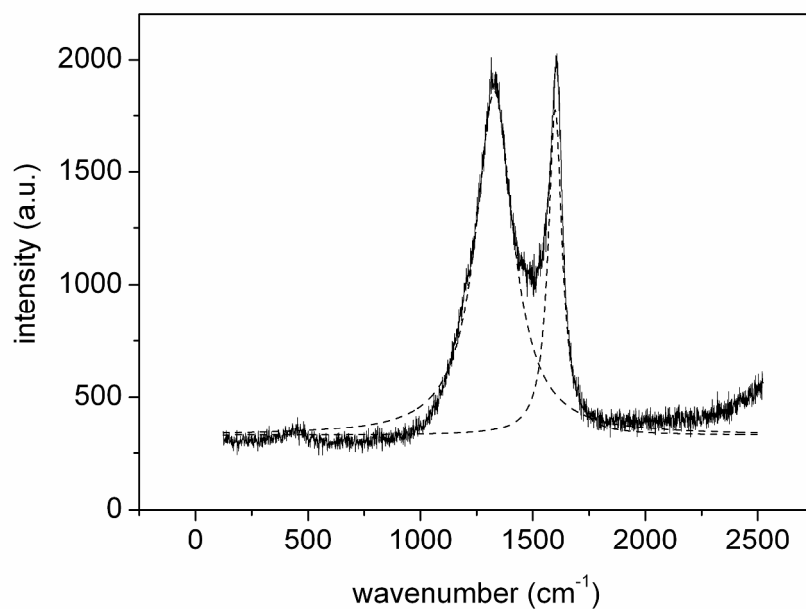

**Supporting Figure S2.** Raman spectrum of the pSi-C composite (solid line). Two Raman bands were observed at  $1330\text{ cm}^{-1}$  and  $1600\text{ cm}^{-1}$  which are assigned to D and G bands (dash line) respectively.

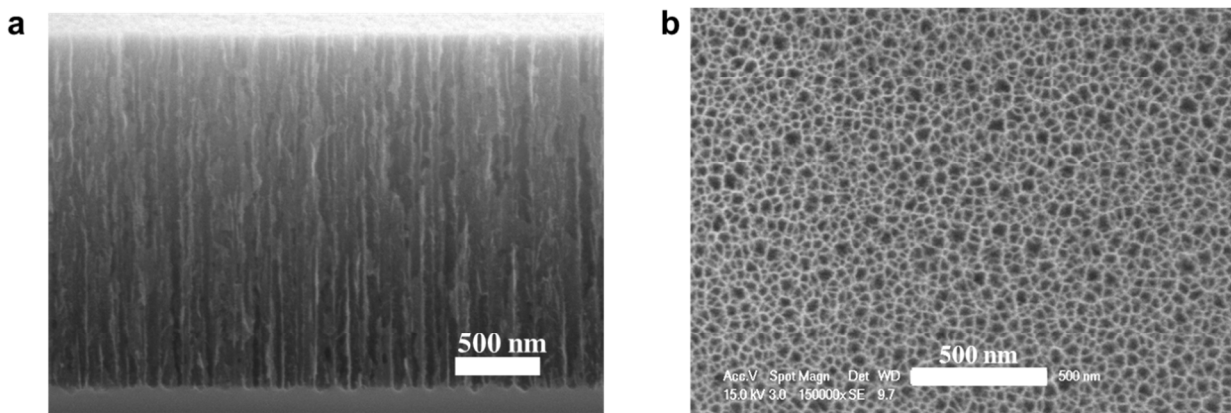

**Supporting Figure S3.** Field emission scanning electron microscope (FESEM) images of representative of the freshly etched porous silicon samples fabricated in this study: (a) cross-sectional image; (b) plan-view image.

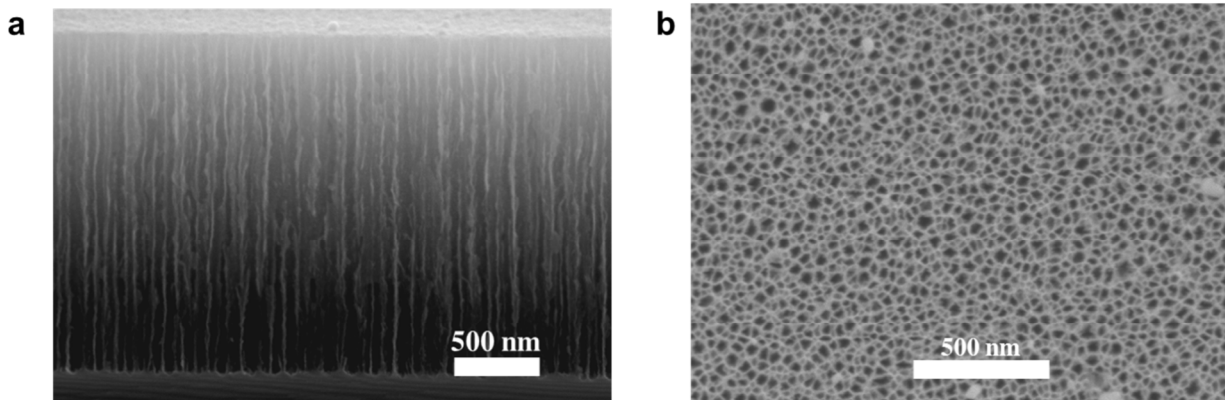

**Supporting Figure S4.** Field emission scanning electron microscope (FESEM) images representative of the PFA-infiltrated pSi samples fabricated in this study. (a) cross-sectional image; (b) plan-view image.

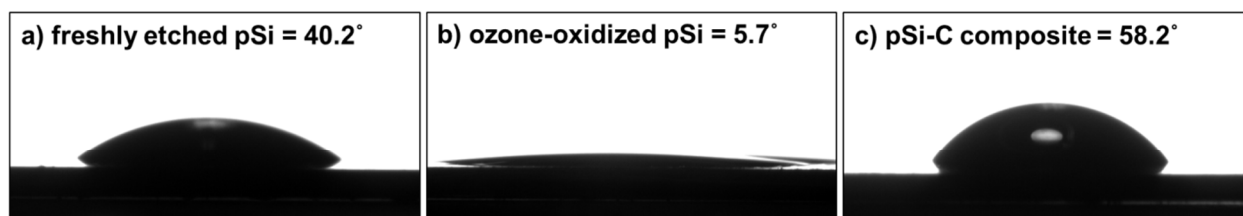

**Supporting Figure S5.** Contact angle measurement photographs, obtained using a Rame-Hart Goniometer (model 500), of (a) freshly etched pSi, (b) ozone-oxidized pSi, and (c) a pSi-C composite.

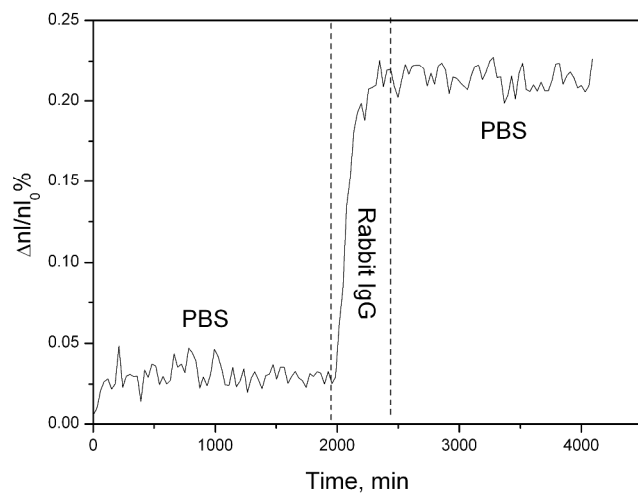

**Supporting Figure S6.** Temporal optical response of the pSi-C biosensor, upon exposure to rabbit IgG (without prior adsorption of protein A). Sample cell was flushed with pure aqueous PBS buffer before and after analyte introduction, as indicated (“PBS”). The Y axis represents the change in optical thickness in %, as defined in eq. 2. Flow rate for all solutions was 0.5 mL min<sup>-1</sup>.

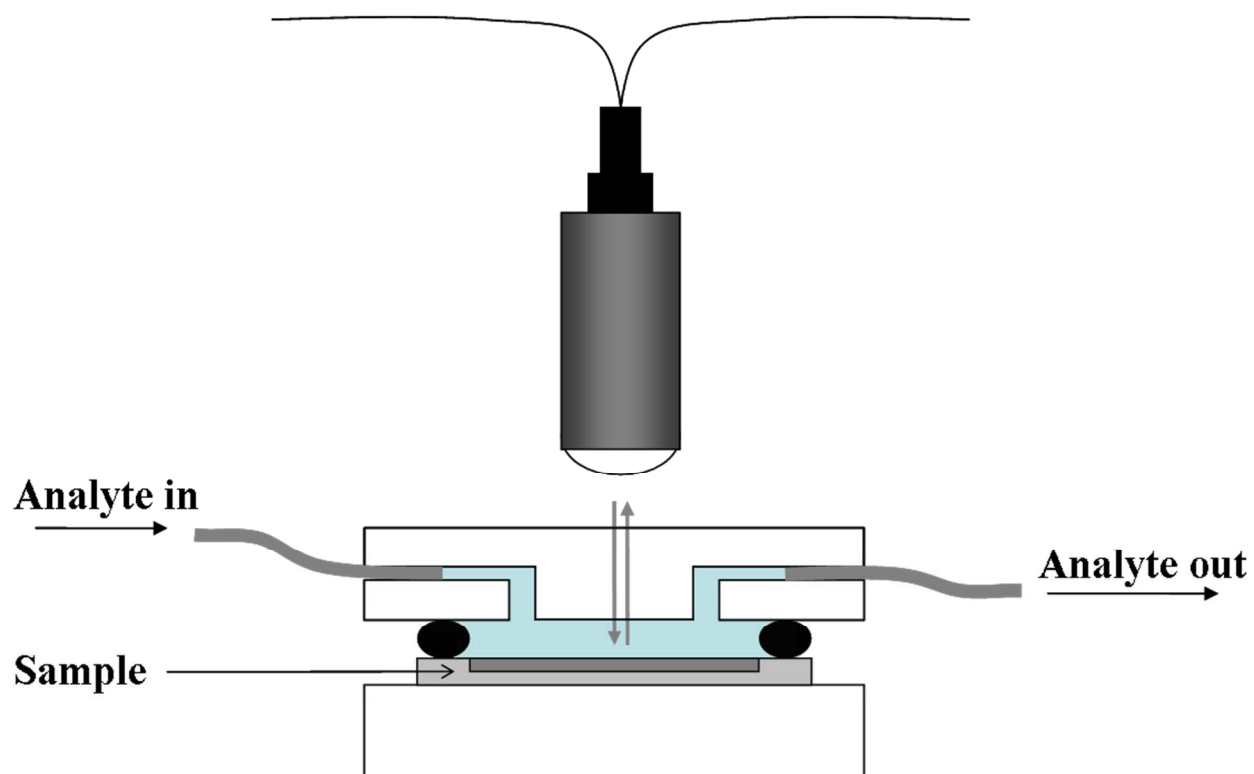

**Supporting Figure S7.** Schematic diagram of the flow cell setup used in biosensing and aqueous stability experiments.
